# Supplementary material for: Restorative Mitigation of Contaminated Soil for Ecosystem Services: Influences from Research Enterprise and Sustainable Development Goals
Source: Copernicus journal article supplement (doi:10.5194/egusphere-2025-271), 2025-07-17
Supplement: Supplementary file [file egusphere-2025-271-CC1-supplement.pdf]

Manuscript number: egusphere-2025-271

“Restorative Mitigation of Contaminated Soil for Ecosystem Services: Influences from Research Enterprise and Sustainable Development Goals” by Isak Rajjak Shaikh & Parveen Rajjak Shaikh

The paper is concisely written and well structured. The purpose and the goals of the study are well explained and explicitly stated in the introduction. Methodology and data collections are described in general in sufficient detail. Results and discussion also provided sufficient information, and I agree that their results are significant. In total, I recommend the paper for the publication as it is.

minor suggestion during proof-read

Brühl et al 2024; Year is missing in the reference list
